# Supplementary material
Source: PubMed Central journal article supplement (PMC10170330)
Supplement: jama-e233079-s002.pdf [file jama-e233079-s002.pdf]

Tu SS, Nagar S, Kesselheim AS, Lu Z, Rome BN. Five-year sales for newly marketed prescription drugs with and without initial Orphan Drug Act designation. *JAMA*. Published May 9, 2023. doi:10.1001/jama.2023.3079

## **Data Sharing Statement**

### **Data**

**Data available:** Yes

**Data types:** Data (not involving human participants)

**How to access data:** [shine.tu@mail.wvu.edu](mailto:shine.tu@mail.wvu.edu)

**When available:** With publication

### **Supporting Documents**

**Document types:** None

### **Additional Information**

**Who can access the data:** Anyone requesting the data

**Types of analyses:** For any purpose

**Mechanisms of data availability:** With a signed data access agreement
